# Supplementary material for: Development and application of reference and routine analytical methods providing SI-traceable results for the determination of technology-critical elements in PCB from WEEE
Source: Royal Society of Chemistry journal article supplement (doi:10.1039/d4ja00235k), 2024-01-01
Supplement: d4ja00235k1.pdf [file d4ja00235k1.pdf]

## Supplementary Information

Table S1. ICP-MS operating parameters used by L1.

| Parameter                         | Thermo iCAPQ                                                                                                                                                                                                                                            |
|-----------------------------------|---------------------------------------------------------------------------------------------------------------------------------------------------------------------------------------------------------------------------------------------------------|
| HF generator                      | 27 MHz                                                                                                                                                                                                                                                  |
| RF power                          | 1550 W                                                                                                                                                                                                                                                  |
| Argon plasma flow rate            | 15 L min <sup>-1</sup>                                                                                                                                                                                                                                  |
| Argon auxiliary flow rate         | 0.65 L min <sup>-1</sup>                                                                                                                                                                                                                                |
| Argon nebulisation flow rate      | 1.1 L min <sup>-1</sup>                                                                                                                                                                                                                                 |
| Nebulizer type and flow rate      | Centric glass nebulizer                                                                                                                                                                                                                                 |
| Spray chamber temperature         | 3°C                                                                                                                                                                                                                                                     |
| Quartz torch with guard electrode | Injector 2.5 mm                                                                                                                                                                                                                                         |
| Sampler cone                      | Ni 1.1 mm                                                                                                                                                                                                                                               |
| Skimmer cone                      | Ni 0.5 mm                                                                                                                                                                                                                                               |
| High voltage interface            | -                                                                                                                                                                                                                                                       |
| Extraction lens                   | -                                                                                                                                                                                                                                                       |
| Focus lens (STD, KED)             | +20 V, -8 V                                                                                                                                                                                                                                             |
| Collision cell                    | Qcell KED                                                                                                                                                                                                                                               |
| CCT bias (STD, KED)               | -2 V, -21V                                                                                                                                                                                                                                              |
| Pole bias (STD, KED)              | -1 V, -18 V                                                                                                                                                                                                                                             |
| D1 lens (STD, KED)                | -196 V, -350 V                                                                                                                                                                                                                                          |
| D2 lens (STD, KED)                | -80 V, -158 V                                                                                                                                                                                                                                           |
| Detector dead time                | 40 ns                                                                                                                                                                                                                                                   |
| Isotope monitored                 | <sup>6</sup> Li, <sup>7</sup> Li, <sup>103</sup> Rh, <sup>104</sup> Pd, <sup>105</sup> Pd,<br><sup>106</sup> Pd, <sup>108</sup> Pd, <sup>139</sup> La, <sup>181</sup> Ta,<br><sup>194</sup> Pt, <sup>195</sup> Pt, <sup>196</sup> Pt, <sup>197</sup> Au |

Table S2. ICP-MS operating parameters used by L2 with AGILENT 8900 TQ ICP-MS.

| Parameter                | Single MS                | MS/MS (He)               | MS/MS (O <sub>2</sub> )  |
|--------------------------|--------------------------|--------------------------|--------------------------|
| Used Cell Gases          | None                     | He                       | O <sub>2</sub>           |
| Nebulizer                | MicroMist                | MicroMist                | MicroMist                |
| Cell gas flow            | None                     | 5 mL L <sup>-1</sup>     | 20 %                     |
| Spraychamber Temperature | 2°C                      | 2°C                      | 2°C                      |
| Interface cones          | Nickel                   | Nickel                   | Nickel                   |
| RF Power                 | 1550 W                   | 1550 W                   | 1550 W                   |
| RF Matching              | 1.30 V                   | 1.30 V                   | 1.30 V                   |
| Nebulizer flow rate      | 1.09 L min <sup>-1</sup> | 1.09 L min <sup>-1</sup> | 1.09 L min <sup>-1</sup> |
| Makeup gas flow rate     | 0.0 L min <sup>-1</sup>  | 0.0 L min <sup>-1</sup>  | 0.0 L min <sup>-1</sup>  |
| Integration time         | 0.1 sec                  | 0.1 sec                  | 0.1 sec                  |
| Extract lens 1           | -9.4 V                   | -9.4 V                   | -9.4V                    |
| Extract lens 2           | -250 V                   | -250 V                   | -250 V                   |
| Omega bias               | -140 V                   | -140 V                   | -140V                    |
| Omega lens               | 8.6 V                    | 8.6 V                    | 8.6 V                    |
| Q1 entrance              | -50 V                    | -50 V                    | -50 V                    |
| Q1 exit                  | 1 V                      | 1 V                      | 1 V                      |
| Cell focus               | -3 V                     | -3 V                     | -3 V                     |
| Cell entrance            | -40 V                    | -50 V                    | -50 V                    |

|                       |        |         |        |
|-----------------------|--------|---------|--------|
| Cell exit             | -50 V  | -60 V   | -60 V  |
| Deflect               | 13.6 V | -4.8 V  | 4.2 V  |
| Plate bias            | -50 V  | -60 V   | -60 V  |
| OctP bias             | -8.0 V | -18.0 V | -5.0 V |
| OctP RF               | 110 V  | 180 V   | 180 V  |
| Energy discrimination | 5.0 V  | 3.0 V   | -7.0 V |

Table S3. ICP-MS operating parameters used by L3 with Agilent 8000.

| Parameter                | Single MS                    | Single MS (He)               | MS/MS (N <sub>2</sub> O)     | MS/MS H2                     | MS/MSH2 HMI                  |
|--------------------------|------------------------------|------------------------------|------------------------------|------------------------------|------------------------------|
| Used Cell Gases          | None                         | He                           | N <sub>2</sub> O             | H <sub>2</sub>               | H <sub>2</sub>               |
| Nebulizer                | Self-aspirating<br>MicroFlow | Self-aspirating<br>MicroFlow | Self-aspirating<br>MicroFlow | Self-aspirating<br>MicroFlow | Self-aspirating<br>MicroFlow |
| Cell gas flow            | None                         | 4.5 mL L <sup>-1</sup>       | 20%                          | 6.0 mL min <sup>-1</sup>     | 6.0 mL min <sup>-1</sup>     |
| Spraychamber Temperature | 2 C                          | 2 C                          | 2°C                          | 2°C                          | 2°C                          |
| Interface cones          | Nickel                       | Nickel                       | Nickel                       | Nickel                       | Nickel                       |
| RF Power                 | 1550 W                       | 1550 W                       | 1550 W                       | 1550 W                       | 1600 W                       |
| RF Matching              | 1.80 V                       |
| Nebulizer flow rate      | 1.07 L min <sup>-1</sup>     | 1.05 L min <sup>-1</sup>     | 1.05 L min <sup>-1</sup>     | 1.05 L min <sup>-1</sup>     | 0.28 L min <sup>-1</sup>     |
| Makeup gas flow rate     | 0.10 L min <sup>-1</sup>     | 0.71 L min <sup>-1</sup>     |
| Integration time         | 0.1 sec                      |
| Extract lens 1           | 0.0 V                        | -2.5 V                       | -9.5 V                       | 0.0 V                        | 0.0 V                        |
| Extract lens 2           | -165 V                       | -190.0 V                     | -200.0 V                     | -175.0 V                     | -200 V                       |
| Omega bias               | -95 V                        | -90 V                        | -100 V                       | -100 V                       | -100 V                       |
| Omega lens               | 10.0 V                       | 9.6 V                        | 10.7 V                       | 10.9 V                       | 11.3 V                       |
| Q1 entrance              | -6 V                         | 0 V                          | -3 V                         | 2 V                          | 0 V                          |
| Q1 exit                  | -3 V                         | 0 V                          | 2 V                          | -3 V                         | -3 V                         |
| Cell focus               | 4.0 V                        | 1.0 V                        | 5.0 V                        | 3.0 V                        | 3.0 V                        |
| Cell entrance            | -40 V                        | -50 V                        | -40 V                        | -50 V                        | -50 V                        |
| Cell exit                | -50 V                        | -60 V                        | -51 V                        | -60 V                        | -60 V                        |
| Deflect                  | 13.6 V                       | -4.2 V                       | 7.6 V                        | -4.0 V                       | -4.4 V                       |
| Plate bias               | -50 V                        | -60 V                        | -50 V                        | -60 V                        | -60 V                        |
| OctP bias                | -8.0 V                       | -20.0 V                      | -0.5 V                       | -18.0 V                      | -18.0 V                      |
| OctP RF                  | 130 V                        | 190 V                        | 170 V                        | 160 V                        | 170 V                        |
| Energy discrimination    | 5.0 V                        | 5.0 V                        | -5.0 V                       | 0.0 V                        | 0.0 V                        |

Table S4. ICP-MS operating parameters used by L4.

| Parameter                         | Thermo Element XR        | Thermo iCAPQ             |
|-----------------------------------|--------------------------|--------------------------|
| HF generator                      | 27 MHz                   | 27 MHz                   |
| RF power                          | 1300 W                   | 1550 W                   |
| Argon plasma flow rate            | 16 L min <sup>-1</sup>   | 14 L min <sup>-1</sup>   |
| Argon auxiliary flow rate         | 0.8 L min <sup>-1</sup>  | 0.8 L min <sup>-1</sup>  |
| Argon nebulisation flow rate      | 1 L min <sup>-1</sup>    | 1 L min <sup>-1</sup>    |
| Nebulizer Seaspray flow rate      | 400 µL min <sup>-1</sup> | 400 µL min <sup>-1</sup> |
| Spray chamber temperature         | 3 °C                     | 3 °C                     |
| Quartz torch with guard electrode | Injector 1.2 mm          | Injector 2.5 mm          |

|                          |                                                                                                                                                                                                                                                   |                                                                                                                                                                                                                                                   |
|--------------------------|---------------------------------------------------------------------------------------------------------------------------------------------------------------------------------------------------------------------------------------------------|---------------------------------------------------------------------------------------------------------------------------------------------------------------------------------------------------------------------------------------------------|
| Sampler cone             | Nickel 1.1 mm                                                                                                                                                                                                                                     | Nickel 1.1 mm                                                                                                                                                                                                                                     |
| Skimmer cone             | Nickel 0.8 mm                                                                                                                                                                                                                                     | Nickel 0.5 mm                                                                                                                                                                                                                                     |
| High voltage interface   | 8000 V                                                                                                                                                                                                                                            | -                                                                                                                                                                                                                                                 |
| Extraction lens          | -2000 V                                                                                                                                                                                                                                           | -                                                                                                                                                                                                                                                 |
| Focus lens (STD, KED)    | -1000 V                                                                                                                                                                                                                                           | +20 V, -8 V                                                                                                                                                                                                                                       |
| Variable mass resolution | LR $\approx$ 300, MR $\approx$ 4000, HR $\approx$ 10000                                                                                                                                                                                           | -                                                                                                                                                                                                                                                 |
| Collision cell           | -                                                                                                                                                                                                                                                 | Qcell KED                                                                                                                                                                                                                                         |
| CCT bias (STD, KED)      | -                                                                                                                                                                                                                                                 | -2 V, -21V                                                                                                                                                                                                                                        |
| Pole bias (STD, KED)     | -                                                                                                                                                                                                                                                 | -1 V, -18 V                                                                                                                                                                                                                                       |
| D1 lens (STD, KED)       | -                                                                                                                                                                                                                                                 | -196 V, -350 V                                                                                                                                                                                                                                    |
| D2 lens (STD, KED)       | -                                                                                                                                                                                                                                                 | -80 V, -158 V                                                                                                                                                                                                                                     |
| Detector dead time       | 9 ns                                                                                                                                                                                                                                              | 40 ns                                                                                                                                                                                                                                             |
| Isotope monitored        | <sup>6</sup> Li, <sup>7</sup> Li, <sup>103</sup> Rh, <sup>104</sup> Pd, <sup>105</sup> Pd, <sup>106</sup> Pd, <sup>108</sup> Pd, <sup>139</sup> La, <sup>181</sup> Ta, <sup>194</sup> Pt, <sup>195</sup> Pt, <sup>196</sup> Pt, <sup>197</sup> Au | <sup>6</sup> Li, <sup>7</sup> Li, <sup>103</sup> Rh, <sup>104</sup> Pd, <sup>105</sup> Pd, <sup>106</sup> Pd, <sup>108</sup> Pd, <sup>139</sup> La, <sup>181</sup> Ta, <sup>194</sup> Pt, <sup>195</sup> Pt, <sup>196</sup> Pt, <sup>197</sup> Au |

Table S5. ICP-MS/MS operating parameters used by L5 with NexION 5000. Measured isotopes for N<sub>2</sub>O DRC mode specify if they were measured on-mass (OM) or mass-shifted (MS)

| Parameter                 | Standard Mode                                          | N <sub>2</sub> O DRC Mode                                                                                                                                                                                                                                                                                                                                                                               |
|---------------------------|--------------------------------------------------------|---------------------------------------------------------------------------------------------------------------------------------------------------------------------------------------------------------------------------------------------------------------------------------------------------------------------------------------------------------------------------------------------------------|
| Scan mode                 | MS/MS                                                  | MS/MS                                                                                                                                                                                                                                                                                                                                                                                                   |
| Cell gas                  | None                                                   | N <sub>2</sub> O (0.5 mL min <sup>-1</sup> )                                                                                                                                                                                                                                                                                                                                                            |
| RPq                       | 0.25                                                   | 0.45                                                                                                                                                                                                                                                                                                                                                                                                    |
| Sample introduction       | Self-aspiration                                        | Self-aspiration                                                                                                                                                                                                                                                                                                                                                                                         |
| Nebulizer                 | PFA MicroFlow                                          | PFA MicroFlow                                                                                                                                                                                                                                                                                                                                                                                           |
| Spray chamber             | Peltier cooled SilQ cyclonic spray chamber             | Peltier cooled SilQ cyclonic spray chamber                                                                                                                                                                                                                                                                                                                                                              |
| Spray chamber temperature | 5 °C                                                   | 5 °C                                                                                                                                                                                                                                                                                                                                                                                                    |
| Interface cones           | Nickel                                                 | Nickel                                                                                                                                                                                                                                                                                                                                                                                                  |
| RF power                  | 1600 W                                                 | 1600 W                                                                                                                                                                                                                                                                                                                                                                                                  |
| Ar nebulizer gas flow     | 1.00 L min <sup>-1</sup>                               | 1.00 L min <sup>-1</sup>                                                                                                                                                                                                                                                                                                                                                                                |
| Ar auxiliary gas flow     | 1.2 L min <sup>-1</sup>                                | 1.2 L min <sup>-1</sup>                                                                                                                                                                                                                                                                                                                                                                                 |
| Ar plasma gas flow        | 16 L min <sup>-1</sup>                                 | 16 L min <sup>-1</sup>                                                                                                                                                                                                                                                                                                                                                                                  |
| Dwell time                | 50 ms                                                  | 50 ms                                                                                                                                                                                                                                                                                                                                                                                                   |
| Measured isotopes         | <sup>59</sup> Co, <sup>195</sup> Pt, <sup>194</sup> Pt | <sup>71</sup> Ga (OM), <sup>72</sup> Ge (MS: +16), <sup>74</sup> Ge (MS: +16), <sup>105</sup> Pd (MS: +16), <sup>139</sup> La (MS: +16), <sup>141</sup> Pr (MS: +16), <sup>143</sup> Nd (MS: +16), <sup>145</sup> Nd (MS: +16), <sup>157</sup> Gd (MS: +16), <sup>160</sup> Gd (MS: +16), <sup>161</sup> Dy (MS: +16), <sup>163</sup> Dy (MS: +16), <sup>181</sup> Ta (MS: +32), <sup>197</sup> Au (OM) |

Table S6. ICP-MS operating parameters used by L6.

| Parameter                    | Thermo Element XR       |
|------------------------------|-------------------------|
| HF generator                 | 27 MHz                  |
| RF power                     | 1160 W                  |
| Argon plasma flow rate       | 16 L min <sup>-1</sup>  |
| Argon auxiliary flow rate    | 0.9 L min <sup>-1</sup> |
| Argon nebulisation flow rate | 1.1 L min <sup>-1</sup> |

|                                      |                                                                                                    |
|--------------------------------------|----------------------------------------------------------------------------------------------------|
| Nebulizer type and flow rate         | Microflow PFA, 100 $\mu\text{L}/\text{min}$                                                        |
| Spray chamber type                   | cyclonic quartz                                                                                    |
| Spray chamber temperature            | room temperature                                                                                   |
| Quartz torch with guard electrode    | injector sapphire 1.5 mm                                                                           |
| Sampler cone                         | nickel 0.8 mm                                                                                      |
| Skimmer cone                         | nickel 0.8 mm                                                                                      |
| High voltage interface               | 8000 V                                                                                             |
| Extraction lens                      | -2000 V                                                                                            |
| Focus lens (STD, KED)                | -1078 V                                                                                            |
| Variable mass resolution adjusted at | LR ( $M/\Delta M \approx 300$ )                                                                    |
| Detector dead time                   | 50 ns                                                                                              |
| Isotopes/isotope ratios monitored    | $^7\text{Li}/^{89}\text{Y}$ , $^{59}\text{Co}/^{121}\text{Sb}$ , $^{139}\text{La}/^{137}\text{Ba}$ |
| Autosample                           | Elemental Scientific, Inc., SC-E2DXS                                                               |

Table S7. ICP-MS operating parameters used by L7.

| Parameter                    | Agilent 8800 QQQ                                                                                                                                              | Thermo ELEMENT 2                                                                                                     |
|------------------------------|---------------------------------------------------------------------------------------------------------------------------------------------------------------|----------------------------------------------------------------------------------------------------------------------|
| RF power                     | 1550 W                                                                                                                                                        | 1300 W                                                                                                               |
| RF matching                  | 1.80 V                                                                                                                                                        | -                                                                                                                    |
| Argon plasma flow rate       | -                                                                                                                                                             | 15 L $\text{min}^{-1}$                                                                                               |
| Argon auxiliary flow rate    | -                                                                                                                                                             | 0.8 L $\text{min}^{-1}$                                                                                              |
| Argon nebulisation flow rate | 1.15 L $\text{min}^{-1}$                                                                                                                                      | 1.079 L $\text{min}^{-1}$                                                                                            |
| Nebulizer type               | PFA MicroFlow                                                                                                                                                 | Duramist PEEK                                                                                                        |
| Spray chamber                | Scott Type PFA                                                                                                                                                | Cyclonic PFA                                                                                                         |
| Spray chamber temperature    | 2 $^{\circ}\text{C}$                                                                                                                                          | -                                                                                                                    |
| Interface cones              | Nickel                                                                                                                                                        | Nickel (Sampler 1.1 mm, Skimmer 0.8 mm)                                                                              |
| Nebulizer pump rate          | 0.2 rps                                                                                                                                                       | 20 rpm                                                                                                               |
| Integration time             | 0.2 s                                                                                                                                                         | 0.05 s                                                                                                               |
| Extraction lens 1            | -55.0 V                                                                                                                                                       | -2000 V                                                                                                              |
| Extraction lens 2            | -115.0 V                                                                                                                                                      | -                                                                                                                    |
| Omega bias                   | -65 V                                                                                                                                                         | -                                                                                                                    |
| Omega lens                   | 8.8 V                                                                                                                                                         | -                                                                                                                    |
| Q1 entrance                  | 1 V                                                                                                                                                           | -                                                                                                                    |
| Q1 exit                      | 0 V                                                                                                                                                           | -                                                                                                                    |
| Cell focus / Focus lens      | -1.0 V                                                                                                                                                        | -                                                                                                                    |
| Cell entrance                | -40 V                                                                                                                                                         | -800 V                                                                                                               |
| Cell exit                    | -56 V                                                                                                                                                         | -                                                                                                                    |
| Deflect                      | 12 V                                                                                                                                                          | -                                                                                                                    |
| Plate bias                   | -45 V                                                                                                                                                         | -                                                                                                                    |
| Instrument Mode              | MS/MS                                                                                                                                                         | MS/MS                                                                                                                |
| Used cell gases              | None                                                                                                                                                          | $\text{H}_2$                                                                                                         |
| Cell gas flow                | -                                                                                                                                                             | 2 mL $\text{min}^{-1}$                                                                                               |
| OctP bias                    | -10.0 V                                                                                                                                                       | -9.5 V                                                                                                               |
| OctP RF                      | 120 V                                                                                                                                                         | 130 V                                                                                                                |
| Energy discrimination        | 9.0 V                                                                                                                                                         | 6.0 V                                                                                                                |
| Isotope monitored            | $^{139}\text{La}$ , $^{105}\text{Pd}$ , $^{106}\text{Pd}$ , $^{108}\text{Pd}$ , $^{194}\text{Pt}$ , $^{196}\text{Pt}$ , $^{147}\text{Sm}$ , $^{149}\text{Sm}$ | $^{41}\text{Pr}$ , $^{145}\text{Nd}$ , $^{146}\text{Nd}$ , $^{161}\text{Dy}$ , $^{163}\text{Dy}$ , $^{197}\text{Au}$ |
|                              |                                                                                                                                                               | Medium Resolution (MR) ( $R \approx 4000$ )                                                                          |
|                              |                                                                                                                                                               | $^6\text{Li}$ , $^7\text{Li}$ , $^{71}\text{Ga}$                                                                     |

Table S8. ICP-MS operating parameters used by L8 with Thermo iCAP TQ ICP-MS.

| Parameter                   | Single MS (He)            | MS/MS (He)<br>Normal flow | MS/MS (He)<br>High flow   | MS/MS (O <sub>2</sub> )                  |
|-----------------------------|---------------------------|---------------------------|---------------------------|------------------------------------------|
| Measuring mode              | SQ-KED                    | TQ-He                     | TQ-iHe                    | TQ-O <sub>2</sub>                        |
| Used Cell Gases             | He                        | He                        | He                        | O <sub>2</sub>                           |
| Nebulizer                   | Self-aspirating<br>PF-STA | Self-aspirating<br>PF-STA | Self-aspirating<br>PF-STA | Self-aspirating<br>PF-STA                |
| Cell gas flow               | 4.5 mL L <sup>-1</sup>    | 4.5 mL L <sup>-1</sup>    | 6.0 mL L <sup>-1</sup>    | 0.30 mL L <sup>-1</sup>                  |
| Spraychamber<br>temperature | 2.70°C                    | 2.70°C                    | 2.70 C                    | 2.70°C                                   |
| Interface cones             | Nickel                    | Nickel                    | Nickel                    | Nickel                                   |
| RF Power                    | 1550 W                    | 1550 W                    | 1550 W                    | 1550 W                                   |
| Nebulizer flow rate*        | 0.76 L min <sup>-1</sup>                 |
| Additional gas flow rate    | 0.20 L min <sup>-1</sup>                 |
| Extraction Lens 2*          | -120 V                    | -120 V                    | -120 V                    | -120 V                                   |
| Q1 Focus Lens*              | 1.30 V                    | 1.30 V                    | 1.30 V                    | 1.30 V                                   |
| D1 Lens                     | -350 V                    | -350 V                    | -350 V                    | -350 V                                   |
| D2 Lens*                    | -155 V                    | -155 V                    | -155 V                    | -155 V                                   |
| Pole Bias                   | -18 V                     | -18 V                     | -18 V                     | -12 V                                    |
| CR Bias                     | -21 V                     | -21 V                     | -21 V                     | -6.50 V                                  |
| Focus Lens                  | 1.00 V                    | 0.00 V                    | 0.00 V                    | -7.50 V                                  |
| Pole Bias Q1                | 2.00 V                    | 2.00 V                    | 2.00 V                    | -2.52 V                                  |
| Detector dead time          | 40 ns                     | 40 ns                     | 40 ns                     | 40 ns                                    |
| <i>*Typical value</i>       |                           |                           |                           |                                          |
| Measured isotopes           | <sup>45</sup> Sc (I.S.)   | <sup>45</sup> Sc (I.S.)   | <sup>45</sup> Sc (I.S.)   | <sup>45</sup> Sc (I.S.)                  |
|                             | <sup>73</sup> Ge (I.S.)   | <sup>103</sup> Rh (I.S.)  | <sup>103</sup> Rh (I.S.)  | <sup>103</sup> Rh (I.S.)                 |
|                             | <sup>103</sup> Rh (I.S.)  | <sup>193</sup> Ir (I.S.)  | <sup>193</sup> Ir (I.S.)  | <sup>193</sup> Ir (I.S.)                 |
|                             | <sup>193</sup> Ir (I.S.)  | <sup>55</sup> Mn (I.S.)   | <sup>63</sup> Cu          | <sup>137</sup> Ba <sup>16</sup> O (I.S.) |
|                             | <sup>105</sup> Pd         | <sup>59</sup> Co          | <sup>65</sup> Cu          | <sup>206</sup> Pb <sup>16</sup> O (I.S.) |
|                             | <sup>106</sup> Pd         | <sup>60</sup> Ni          |                           | <sup>71</sup> Ga                         |
|                             | <sup>108</sup> Pd         | <sup>62</sup> Ni          |                           | <sup>139</sup> La <sup>16</sup> O        |
|                             | <sup>194</sup> Pt         |                           |                           | <sup>141</sup> Pr <sup>16</sup> O        |
|                             | <sup>195</sup> Pt         |                           |                           | <sup>143</sup> Nd <sup>16</sup> O        |
|                             |                           |                           |                           | <sup>145</sup> Nd <sup>16</sup> O        |
|                             |                           |                           |                           | <sup>155</sup> Gd <sup>16</sup> O        |
|                             |                           |                           |                           | <sup>157</sup> Gd <sup>16</sup> O        |
|                             |                           |                           |                           | <sup>161</sup> Dy <sup>16</sup> O        |
|                             |                           |                           |                           | <sup>163</sup> Dy <sup>16</sup> O        |
|                             |                           |                           |                           | <sup>197</sup> Au                        |
